# Supplementary material for: Joint fundamental frequency and order estimation using optimal filtering
Source: Springer Nature journal article supplement (doi:10.1186/1687-6180-2011-13), 2011-06-13

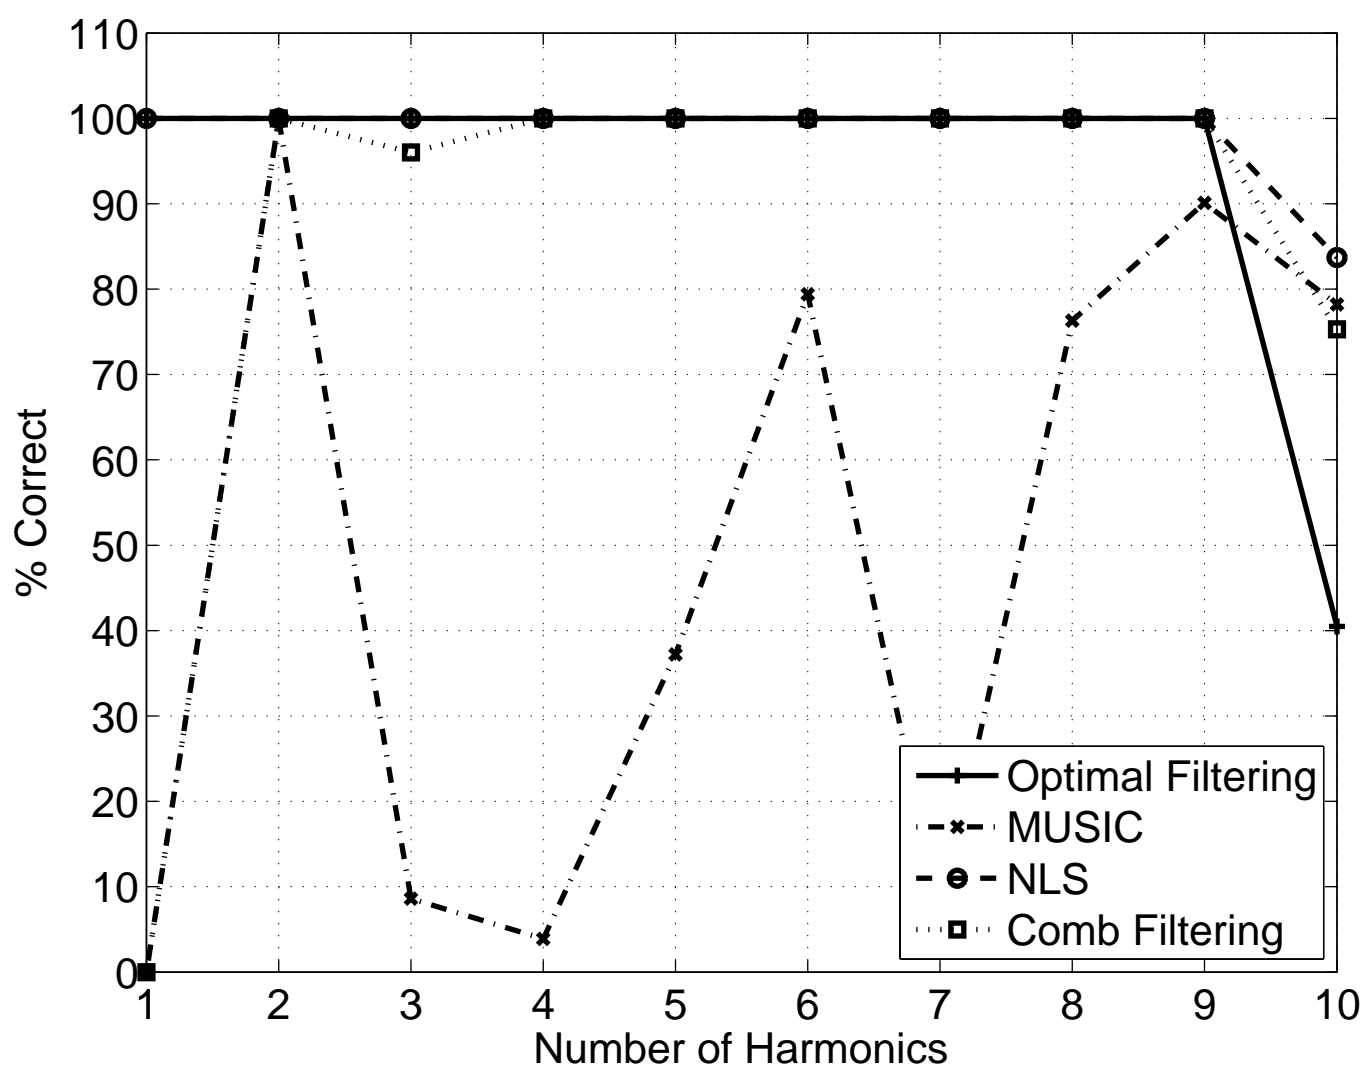

Supplement: 13634_2010_12_MOESM5_ESM.pdf [file 13634_2010_12_MOESM5_ESM.pdf]
